# Supplementary material
Source: ML conference proceedings conference paper supplement (https://openaccess.thecvf.com/content/CVPR2023/html/Li_Adversarially_Masking_Synthetic_CVPR_2023_paper.html)
Supplement: Supplementary file 1 [file Li_Adversarially_Masking_Synthetic_CVPR_2023_supplemental.pdf]

# Adversarially Masking Synthetic to Mimic Real: Adaptive Noise Injection for Point Cloud Segmentation Adaptation

–*Supplementary Materials*–

Guangrui Li<sup>1,2\*</sup>, Guoliang Kang<sup>3†</sup>, Xiaohan Wang<sup>4</sup>, Yunchao Wei<sup>5</sup>, Yi Yang<sup>4</sup>

<sup>1</sup> ReLER, AAIL, University of Technology Sydney   <sup>2</sup>Baidu Inc.   <sup>3</sup> Beihang University

<sup>4</sup> ReLER, CCAI, Zhejiang University   <sup>5</sup> Beijing Jiaotong University.

[www.guangrui.li/projects/ASM](http://www.guangrui.li/projects/ASM)

In the following sections, we first present more quantitative results for a better comparison against previous methods in Appendix A. Then in Appendix B, we show more qualitative results to enable more intuitive understanding and comparisons. Finally, in Appendix C, we provide more implementation details.

## A. More Quantitative Results

Table A. Experiments results of GTA-LiDAR [6] → SemKITTI [1] with SqueezeSegV2 as backbone.

| Methods          | Car         | Pedestrian  | mIoU        |
|------------------|-------------|-------------|-------------|
| SqueezeSegV2 [6] | 63.2        | 12.8        | 38.0        |
| ePointDA [8]     | 70.7        | 12.9        | 41.8        |
| Ours             | <b>73.1</b> | <b>13.3</b> | <b>43.2</b> |

Table B. Comparison with CosMix following their setup on SynLiDAR [7] → SemKITTI [1].

| Method      | car         | bi.cle     | mt.cle      | truck       | oth-v.      | pers.       | b.clst      | m.clst      | road        | park.       | sidew.      | oth-g.     | build.      | fence       | veget.      | trunk       | terra.      | pole        | traff.      | mIoU        |
|-------------|-------------|------------|-------------|-------------|-------------|-------------|-------------|-------------|-------------|-------------|-------------|------------|-------------|-------------|-------------|-------------|-------------|-------------|-------------|-------------|
| ADDA [4]    | 52.5        | 4.5        | 11.9        | 0.3         | 3.9         | 9.4         | 27.9        | 0.5         | 52.8        | 4.9         | 27.4        | 0.0        | 61.0        | 17.0        | 57.4        | 34.5        | 42.9        | 23.2        | 4.5         | 23.0        |
| Ent-Min [5] | 58.3        | 5.1        | 14.3        | 0.3         | 1.8         | 14.3        | <b>44.5</b> | 0.5         | 50.4        | 4.3         | 34.8        | 0.0        | 48.3        | 19.7        | 67.5        | 34.8        | <b>52.0</b> | 33.0        | 6.1         | 25.8        |
| ST [9]      | 62.0        | 5.0        | 12.4        | 1.3         | 9.2         | 16.7        | 44.2        | 0.4         | 53.0        | 2.5         | 28.4        | 0.0        | 57.1        | 18.7        | 69.8        | <b>35.0</b> | 48.7        | 32.5        | 6.9         | 26.5        |
| PCT [7]     | 53.4        | 5.4        | 7.4         | 0.8         | 10.9        | 12.0        | 43.2        | 0.3         | 50.8        | 3.7         | 29.4        | 0.0        | 48.0        | 10.4        | 68.2        | 33.1        | 40.0        | 29.5        | 6.9         | 23.9        |
| ST-PCT [7]  | 70.8        | <b>7.3</b> | 13.1        | 1.9         | 8.4         | 12.6        | 44.0        | 0.6         | 56.4        | 4.5         | 31.8        | 0.0        | <b>66.7</b> | <b>23.7</b> | <b>73.3</b> | 34.6        | 48.4        | <b>39.4</b> | 11.7        | 28.9        |
| CosMix [3]  | 75.1        | 6.8        | 29.4        | <b>27.1</b> | <b>11.1</b> | <b>22.1</b> | 25.0        | 24.7        | <b>79.3</b> | 14.9        | 46.7        | <b>0.1</b> | 53.4        | 13.0        | 67.7        | 31.4        | 32.1        | 37.9        | <b>13.4</b> | 32.2        |
| Ours        | <b>75.8</b> | <b>7.3</b> | <b>34.6</b> | 26.8        | 10.8        | 21.3        | 40.3        | <b>25.1</b> | 60.4        | <b>18.3</b> | <b>48.1</b> | <b>0.1</b> | 58.4        | 14.3        | 72.3        | 33.3        | 40.2        | 36.6        | 8.2         | <b>33.3</b> |

Here we present the quantitative comparisons with previous methods on more benchmarks.

In Table A, following the setting of ePointDA [8], we run our method on the transfer GTA-LiDAR → SemKITTI and compare with previous solutions. Apparently, our method still maintains its superiority against them, further proving the effectiveness of the proposed approach.

Then in Table B, we run experiments following the configuration of CoSMix [3], and our method surpasses CoSMix by 1.1 % mIoU, validating a better adaptation performance on both benchmarks.

Besides, in Fig. A, we compare the bar plots of per-class IoUs to provide a more intuitive illustration of the gain we made against the baseline.

\*Work done during an internship at Baidu.

†corresponding author

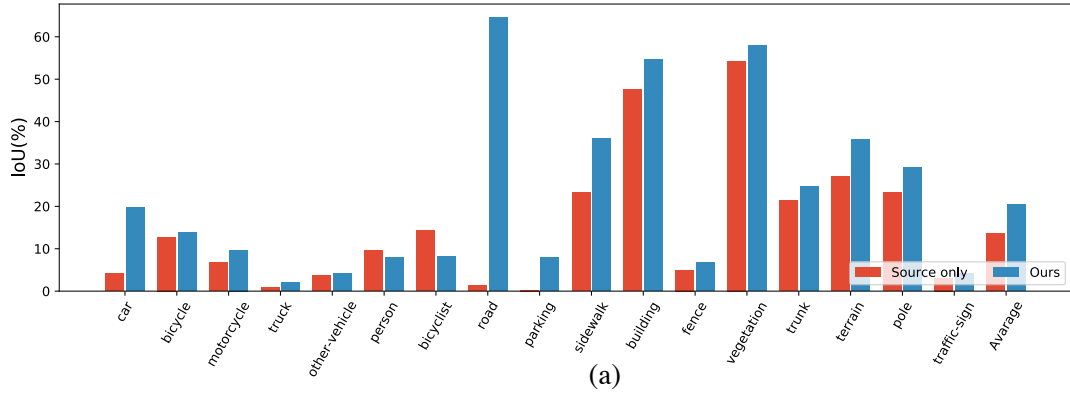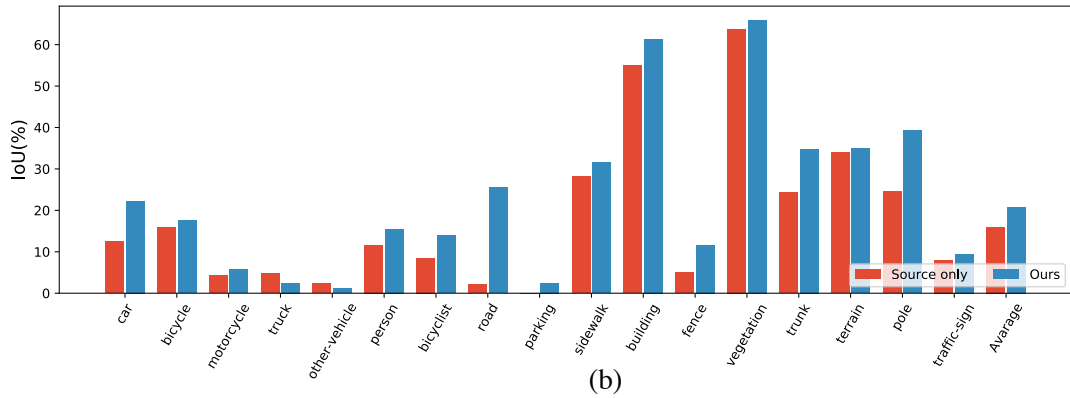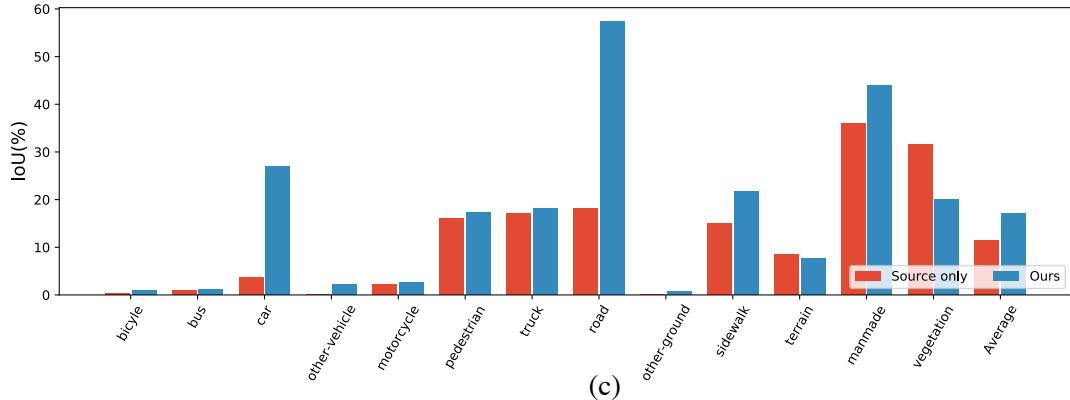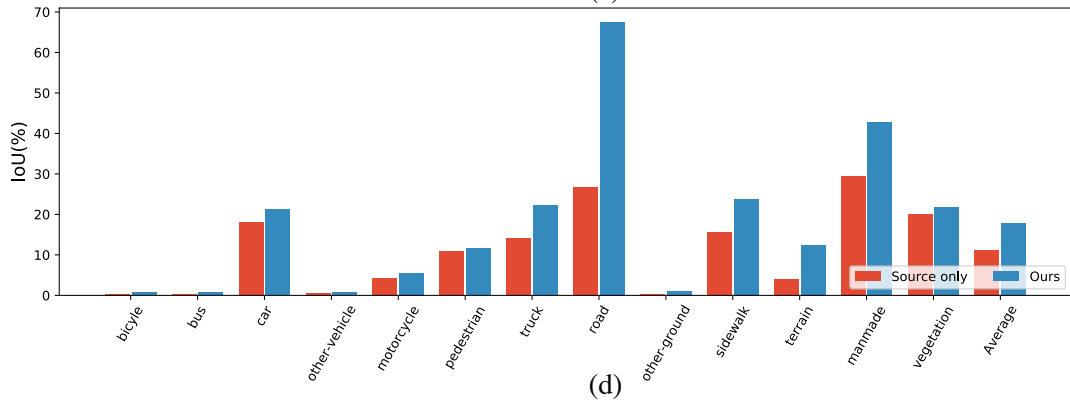

Figure A. Comparison on Per-class IoU with the baseline. SynLiDAR → SemKITTI with SqueezeSegV2 (a) and SalsaNext (b), and SynLiDAR → nuScenes with SqueezeSegV2 (c) and SalsaNext (d).

## B. More Qualitative Analysis

In Fig. B and Fig. C, we present more visualizations regarding both raw points and projected LiDAR images, and compare our results with the source-only model, AdaptSeg, and the ground truth.

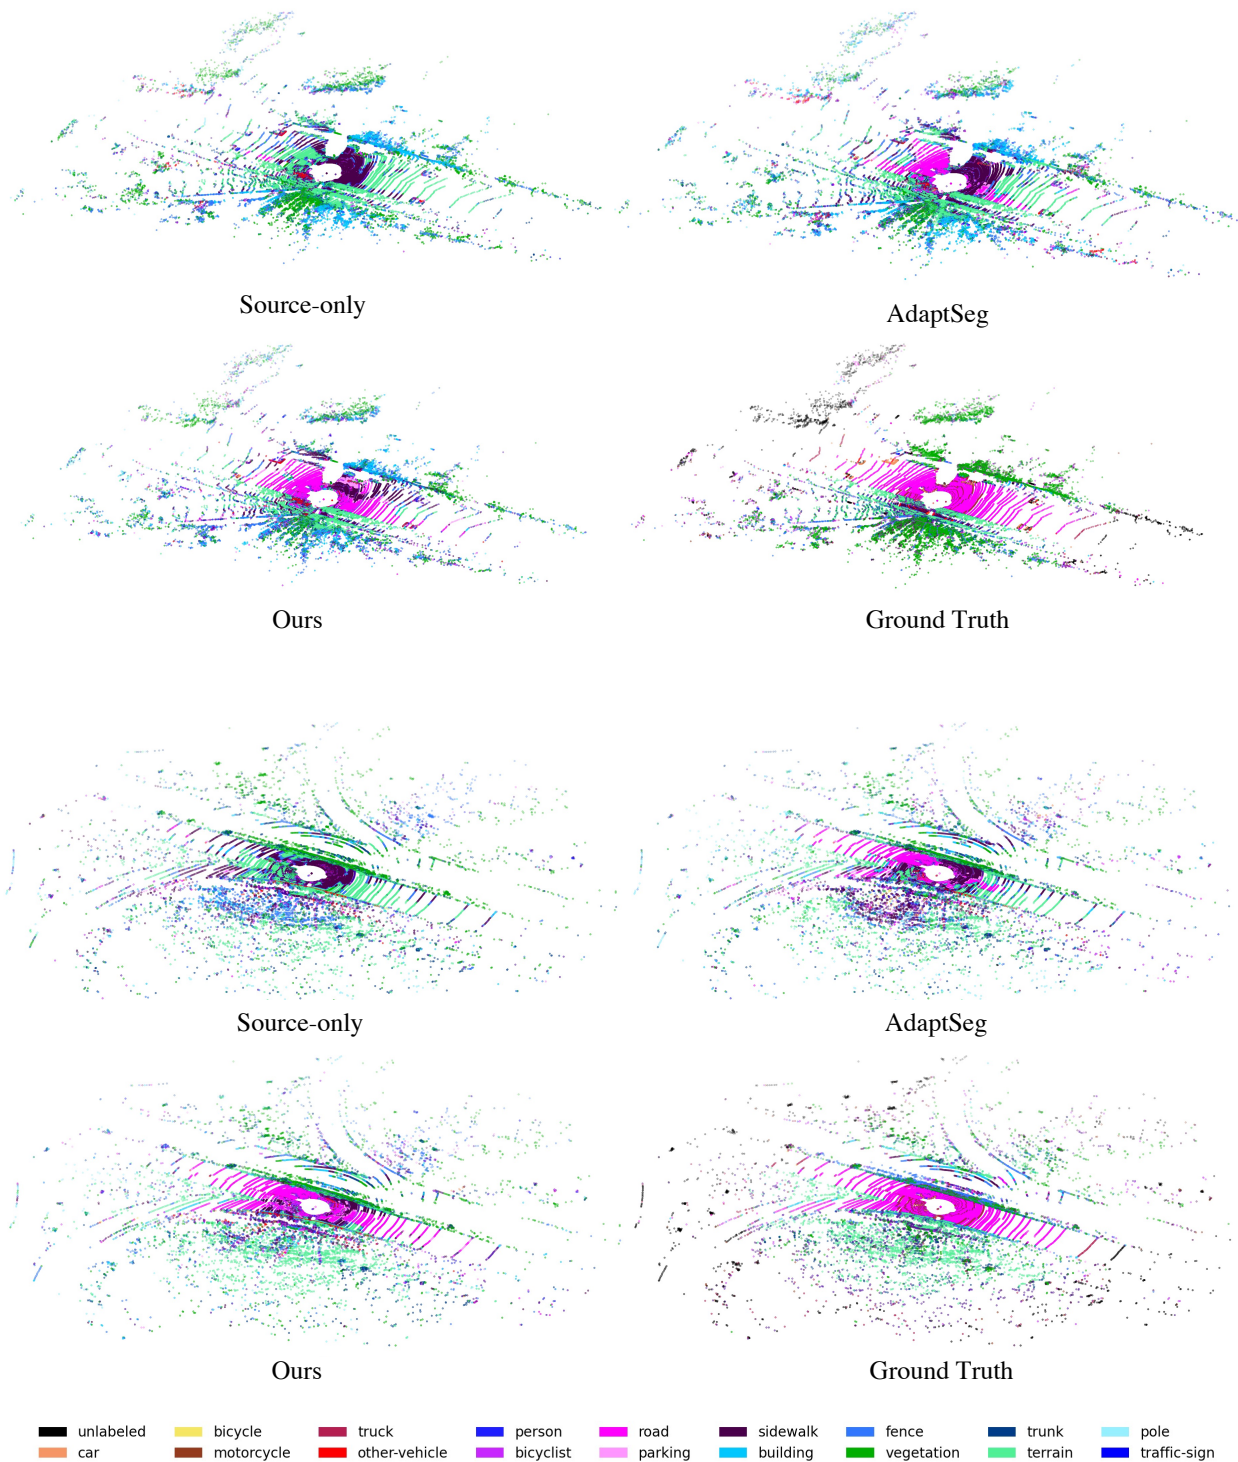

Figure B. Visualization results for SynLiDAR  $\rightarrow$  SemKITTI.

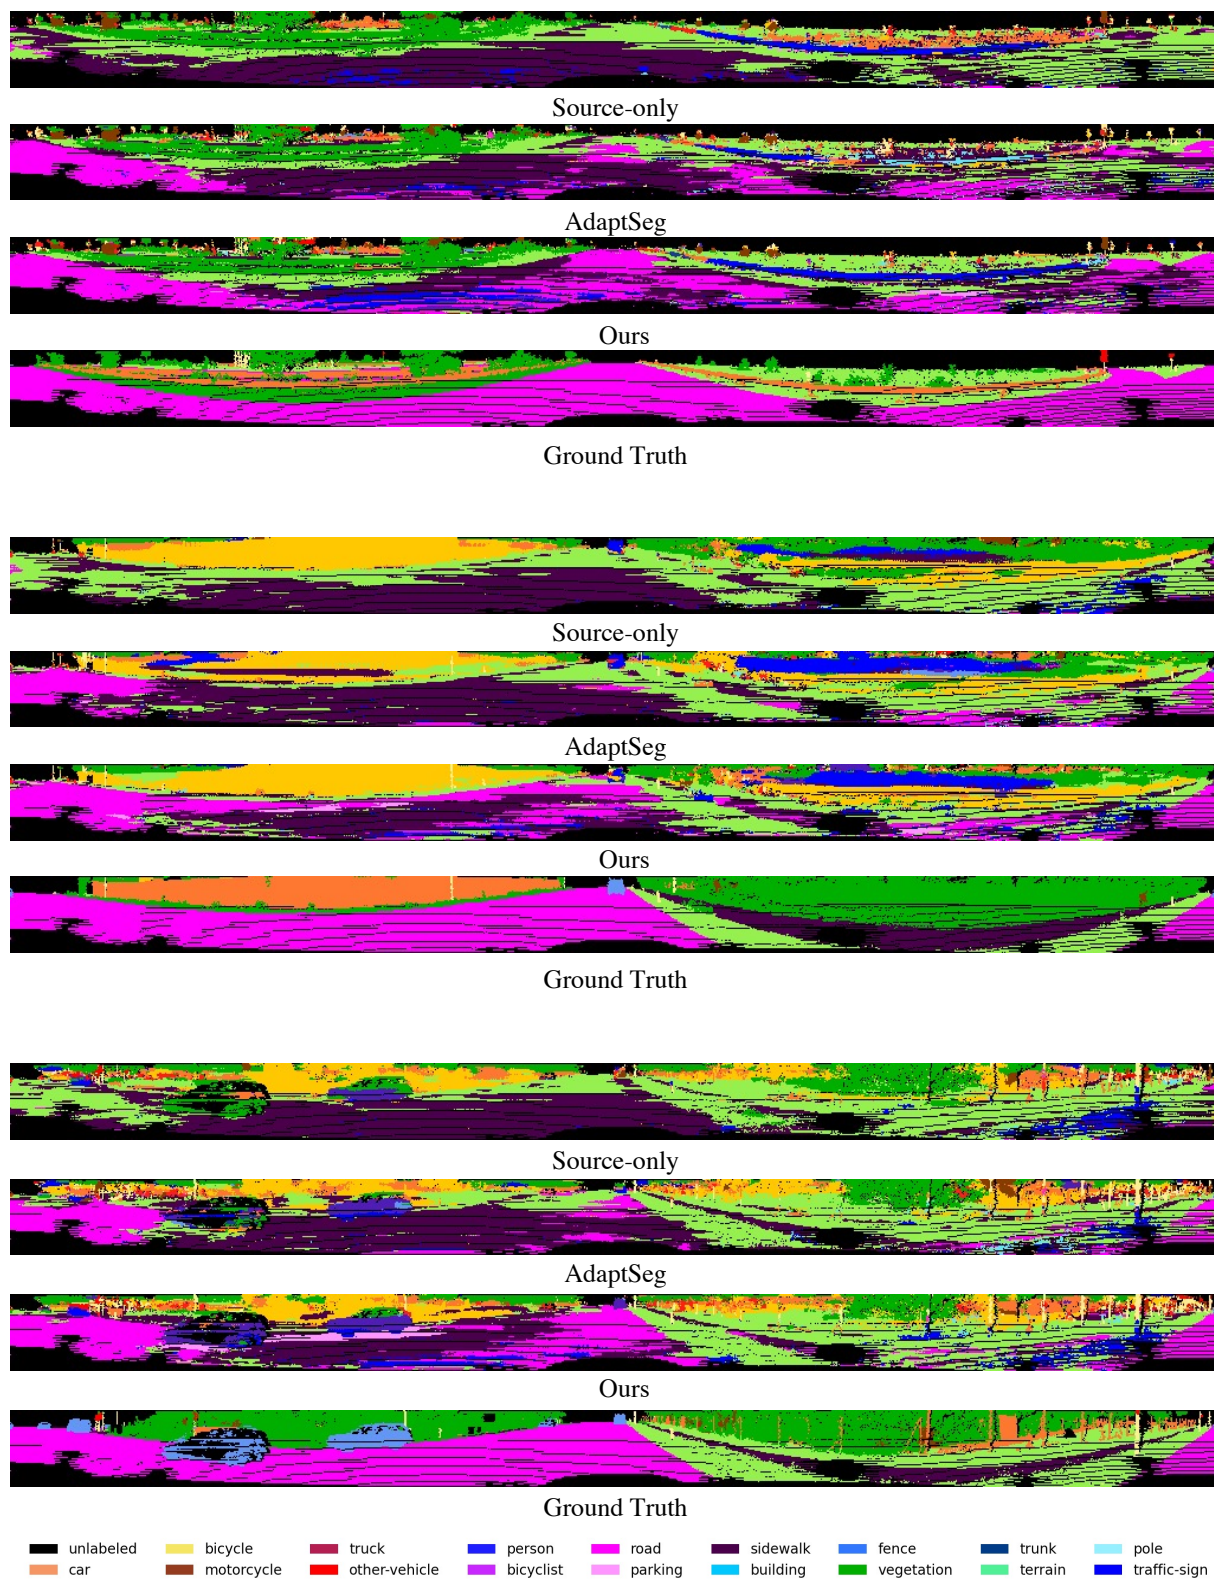

Figure C. Visualization results for SynLiDAR → SemKITTI with projected LiDAR images.

## C. More Implementation Details

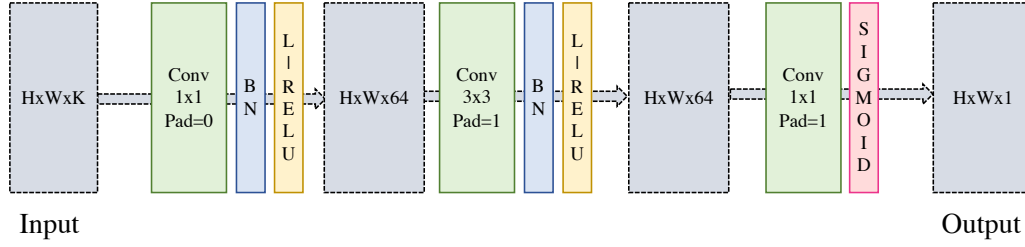

Figure D. **Architecture of the Domain Discriminator**, where “L-RELU” denotes the leaky-relu with slope of 0.1 and “BN” denotes BatchNorm layer.

**Architecture of the Domain Discriminator.** In Fig. D, we present the architecture of the domain discriminator, which consists of three convolution layers and several non-linear layers. Note that we employ BatchNorm (BN) after each convolution layer because it can stabilize the training process. We use “L-RELU” to denote Leaky-ReLU with slope of 0.1.

---

### Algorithm 1 PyTorch-style Pseudocode for Adaptive Spatial Masking (ASM) Module

---

```

import torch.nn as nn
import torch.nn.functional as F
class ASM_module(nn.Module):
    def __init__(self, ):
        super().__init__()
        mid = 32
        # Embedding Branch e
        self.conv1 = nn.Conv2d(3, mid, kernel_size=1, stride=1)
        self.bn1 = nn.BatchNorm2d(mid)
        # Embedding Branch o
        self.conv2 = nn.Conv2d(32, mid, kernel_size=1, stride=1)
        self.bn2 = nn.BatchNorm2d(mid)
        # Fusion Head
        self.conv3 = nn.Conv2d(mid*2, 2, kernel_size=1, stride=1)
    def forward(self, coord, feat):
        # Embed coordinates and features accordingly.
        ori_feat = feat
        cod = self.conv1(coord)
        cod = self.bn1(cod)
        cod = torch.relu(cod)
        feat = self.conv2(feat)
        feat = self.bn2(feat)
        feat = torch.relu(feat)
        # Fusion with concatenation
        fused = torch.cat([cod, feat], dim=1)
        fused = self.conv3(fused)
        # Apply Gumbel-Softmax
        fused = F.gumbel_softmax(fused, hard=True, dim=1)
        mask = fused[:, :1, :, :]
        feat = ori_feat * mask
        return feat

```

---

**Implementation of Adaptive Spatial Masking Module.** In Algorithm 1, we present the implementation of ASM module to enable a better understanding of the proposed method.

**Label Mappings.** In Table C and Table D, we present label mappings for two transfer tasks respectively.

Table C. Label Mapping for SynLIDAR → SemKITTI

| SynLIDAR [7] |                 |           |               | SemKITTI [1] |                      |           |               |
|--------------|-----------------|-----------|---------------|--------------|----------------------|-----------|---------------|
| ID           | Name            | Mapped ID | Mapped Name   | ID           | Name                 | Mapped ID | Mapped Name   |
| 0            | unlabeled       | 0         | unlabeled     | 0            | unlabeled            | 0         | unlabeled     |
| 1            | car             | 1         | car           | 1            | outlier              | 0         | unlabeled     |
| 2            | pick-up         | 4         | truck         | 10           | car                  | 1         | car           |
| 3            | truck           | 4         | truck         | 11           | bicycle              | 2         | bicycle       |
| 4            | bus             | 5         | other-vehicle | 13           | bus                  | 5         | other-vehicle |
| 5            | bicycle         | 2         | bicycle       | 15           | motorcycle           | 3         | motorcycle    |
| 6            | motorcycle      | 3         | motorcycle    | 16           | on-rails             | 5         | other-vehicle |
| 7            | other-vehicle   | 5         | other-vehicle | 18           | truck                | 4         | truck         |
| 8            | road            | 8         | road          | 20           | other-vehicle        | 5         | other-vehicle |
| 9            | sidewalk        | 10        | sidewalk      | 30           | person               | 6         | person        |
| 10           | parking         | 9         | parking       | 31           | bicyclist            | 7         | bicyclist     |
| 11           | other-ground    | 9         | parking       | 32           | motorcyclist         | 3         | motorcycle    |
| 12           | female          | 6         | person        | 40           | road                 | 8         | road          |
| 13           | male            | 6         | person        | 44           | parking              | 9         | parking       |
| 14           | kid             | 6         | person        | 48           | sidewalk             | 10        | sidewalk      |
| 15           | crowd           | 6         | person        | 49           | other-ground         | 9         | parking       |
| 16           | bicyclist       | 7         | bicyclist     | 50           | building             | 11        | building      |
| 17           | motorcyclist    | 3         | motorcycle    | 51           | fence                | 12        | fence         |
| 18           | building        | 11        | building      | 52           | other-structure      | 0         | unlabeled     |
| 19           | other-structure | 0         | unlabeled     | 60           | lane-marking         | 8         | road          |
| 20           | vegetation      | 13        | vegetation    | 70           | vegetation           | 13        | vegetation    |
| 21           | trunk           | 14        | trunk         | 71           | trunk                | 14        | trunk         |
| 22           | terrain         | 15        | terrain       | 72           | terrain              | 15        | terrain       |
| 23           | traffic-sign    | 17        | traffic-sign  | 80           | pole                 | 16        | pole          |
| 24           | pole            | 16        | pole          | 81           | traffic-sign         | 17        | traffic-sign  |
| 25           | traffic-cone    | 0         | unlabeled     | 99           | other-object         | 0         | unlabeled     |
| 26           | fence           | 12        | fence         | 252          | moving-car           | 1         | car           |
| 27           | garbage-can     | 0         | unlabeled     | 253          | moving-bicyclist     | 7         | bicyclist     |
| 28           | electric-box    | 0         | unlabeled     | 254          | moving-person        | 6         | person        |
| 29           | table           | 0         | unlabeled     | 255          | moving-motorcyclist  | 8         | road          |
| 30           | chair           | 0         | unlabeled     | 256          | moving-on-rails      | 5         | other-vehicle |
| 31           | bench           | 0         | unlabeled     | 257          | moving-bus           | 5         | other-vehicle |
| 32           | other-object    | 0         | unlabeled     | 258          | moving-truck         | 4         | truck         |
|              |                 |           |               | 259          | moving-other-vehicle | 5         | other-vehicle |

Table D. Label Mapping for SynLIDAR → nuScenes

| SynLIDAR [7] |                 |           |                | nuScenes [2] |                                      |           |                |
|--------------|-----------------|-----------|----------------|--------------|--------------------------------------|-----------|----------------|
| ID           | Name            | Mapped ID | Mapped Name    | ID           | Name                                 | Mapped ID | Mapped Name    |
| 0            | unlabeled       | 0         | unlabeled      | 1            | animal                               | 0         | unlabeled      |
| 1            | car             | 3         | car            | 5            | human-pedestrian-personal mobility   | 0         | unlabeled      |
| 2            | pick-up         | 7         | truck          | 7            | human-pedestrian-stroller            | 0         | unlabeled      |
| 3            | truck           | 7         | truck          | 8            | human-pedestrian-wheelchair          | 0         | unlabeled      |
| 4            | bus             | 2         | bus            | 10           | movable object-debris                | 0         | unlabeled      |
| 5            | bicycle         | 1         | bicycle        | 11           | movable object-pushable pullable     | 0         | unlabeled      |
| 6            | motorcycle      | 5         | motorcycle     | 13           | static object-bicycle rack           | 0         | unlabeled      |
| 7            | other-vehicle   | 4         | other vehicles | 19           | vehicle-emergency-ambulance          | 4         | other vehicles |
| 8            | road            | 8         | road           | 20           | vehicle-emergency-police             | 4         | other vehicles |
| 9            | sidewalk        | 10        | sidewalk       | 0            | unlabeled                            | 0         | unlabeled      |
| 10           | parking         | 9         | other ground   | 29           | static-other                         | 0         | unlabeled      |
| 11           | other-ground    | 9         | other ground   | 31           | vehicle-ego                          | 0         | unlabeled      |
| 12           | female          | 6         | pedestrian     | 9            | movable object-barrier               | 12        | manmade        |
| 13           | male            | 6         | pedestrian     | 14           | vehicle-bicycle                      | 1         | bicycle        |
| 14           | kid             | 6         | pedestrian     | 15           | vehicle-bus-bendy                    | 2         | bus            |
| 15           | crowd           | 6         | pedestrian     | 16           | vehicle-bus-rigid                    | 2         | bus            |
| 16           | bicyclist       | 1         | bicycle        | 17           | vehicle-car                          | 3         | car            |
| 17           | motorcyclist    | 5         | motorcycle     | 18           | vehicle-construction                 | 4         | other vehicles |
| 18           | building        | 12        | manmade        | 21           | vehicle-motorcycle                   | 5         | motorcycle     |
| 19           | other-structure | 12        | manmade        | 2            | human-pedestrian-adult               | 6         | pedestrian     |
| 20           | vegetation      | 13        | vegetation     | 3            | human-pedestrian-child               | 6         | pedestrian     |
| 21           | trunk           | 7         | truck          | 4            | human-pedestrian-construction worker | 6         | pedestrian     |
| 22           | terrain         | 11        | terrain        | 6            | human-pedestrian-police officer      | 6         | pedestrian     |
| 23           | traffic-sign    | 12        | manmade        | 12           | movable object-trafficcone           | 12        | manmade        |
| 24           | pole            | 12        | manmade        | 22           | vehicle-trailer                      | 4         | other vehicles |
| 25           | traffic-cone    | 12        | manmade        | 23           | vehicle-truck                        | 7         | truck          |
| 26           | fence           | 12        | manmade        | 24           | flat-driveable surface               | 8         | road           |
| 27           | garbage-can     | 12        | manmade        | 25           | flat-other                           | 9         | other ground   |
| 28           | electric-box    | 12        | manmade        | 26           | flat-sidewalk                        | 10        | sidewalk       |
| 29           | table           | 0         | unlabeled      | 27           | flat-terrain                         | 11        | terrain        |
| 30           | chair           | 0         | unlabeled      | 28           | static-manmade                       | 12        | manmade        |
| 31           | bench           | 12        | manmade        | 30           | static-vegetation                    | 13        | vegetation     |
| 32           | other-object    | 0         | unlabeled      |              |                                      |           |                |

## References

- [1] J. Behley, M. Garbade, A. Milioto, J. Quenzel, S. Behnke, C. Stachniss, and J. Gall. SemanticKITTI: A Dataset for Semantic Scene Understanding of LiDAR Sequences. In *ICCV*, 2019. 1, 6
- [2] Holger Caesar, Varun Bankiti, Alex H. Lang, Sourabh Vora, Venice Erin Liong, Qiang Xu, Anush Krishnan, Yu Pan, Giancarlo Baldan, and Oscar Beijbom. nuscenes: A multimodal dataset for autonomous driving. *CVPR*, 2020. 7
- [3] Cristiano Saltori, Fabio Galasso, Giuseppe Fiameni, Nicu Sebe, Elisa Ricci, and Fabio Poiesi. Cosmix: Compositional semantic mix for domain adaptation in 3d lidar segmentation. *ECCV*, 2022. 1
- [4] Eric Tzeng, Judy Hoffman, Kate Saenko, and Trevor Darrell. Adversarial discriminative domain adaptation. In *CVPR*, 2017. 1
- [5] Tuan-Hung Vu, Himalaya Jain, Maxime Bucher, Mathieu Cord, and Patrick Pérez. Advent: Adversarial entropy minimization for domain adaptation in semantic segmentation. In *CVPR*, 2019. 1
- [6] Bichen Wu, Xuanyu Zhou, Sicheng Zhao, Xiangyu Yue, and Kurt Keutzer. Squeezesegv2: Improved model structure and unsupervised domain adaptation for road-object segmentation from a lidar point cloud. In *ICRA*, 2019. 1
- [7] Aoran Xiao, Jiaying Huang, Dayan Guan, Fangneng Zhan, and Shijian Lu. Synlidar: Learning from synthetic lidar sequential point cloud for semantic segmentation. *AAAI*, 2022. 1, 6, 7
- [8] Sicheng Zhao, Yezhen Wang, Bo Li, Bichen Wu, Yang Gao, Pengfei Xu, Trevor Darrell, and Kurt Keutzer. epointda: An end-to-end simulation-to-real domain adaptation framework for lidar point cloud segmentation. In *AAAI*, 2021. 1
- [9] Yang Zou, Zhiding Yu, Xiaofeng Liu, B.V.K. Vijaya Kumar, and Jinsong Wang. Confidence regularized self-training. In *ICCV*, 2019. 1
